# Supplementary material for: Nanoconfinement catalysis-enhanced electrochemiluminescence aptasensor for the sensitive detection of matrix metalloproteinase-9
Source: Royal Society of Chemistry journal article supplement (doi:10.1039/d6ra00374e), 2026-05-07
Supplement: d6ra00374e1.pdf [file d6ra00374e1.pdf]

**TABLE**

**Table S1** Comparison of Current MMP-9 Assay Methods

| Sensing platform                | Method | Detection range (ng/mL) | LOD (pg/mL)         | Ref.      |
|---------------------------------|--------|-------------------------|---------------------|-----------|
| Fc-CMCS/DEX-ALD                 | EC     | 50-10 <sup>3</sup>      | 7.3×10 <sup>4</sup> | 1         |
| Apt-9/Apt-2/PDANS               | FL     | 0.024-0.6               | 9.6                 | 2         |
| Apt/Au@BNNT/PCB                 | EC     | 0.1-10 <sup>4</sup>     | 21.8                | 3         |
| cAb-MBs/SPCE                    | EC     | 8×10 <sup>-3</sup> -10  | 2.4                 | 4         |
| Ir-peptide/MCH/AuNPs/Nafion/GCE | ECL    | 1-50                    | 500                 | 5         |
| NGQDs@NH <sub>2</sub> -VMSF/ITO | ECL    | 10 <sup>-3</sup> -100   | 0.1                 | This work |

Fc-CMCS, ferrocene-modified MMP-9 cleavage peptide modified carboxymethyl chitosan; DEX-ALD, dextran-aldehyde; EC, Electrochemistry; PDANS, polydopamine nanosphere; FL, fluorescence; AuNPs, gold nanoparticles; Au@BNNTs, Au-decorated boron nitride nanotubes; PCB, printed circuit board; cAb, capture antibody; MBs, magnetic microbeads; SPCE, screen-printed carbon electrode; Ir-peptide, the peptide labelled with the Ir; MCH, 6-mercaptop-1-hexanol; GCE, glassy carbon electrode; ECL, electrochemiluminescence.

**Table S2** Detection of MMP-9 in fetal bovine serum (FBS) with the constructed aptasensor.

| Sample | Added (ng/mL) | Found (ng/mL) | Recovery (%) | RSD (% , n = 3) |
|--------|---------------|---------------|--------------|-----------------|
|        | 0.00100       | 0.00104       | 104          | 1.2             |
| FBS    | 0.100         | 0.102         | 102          | 1.1             |
|        | 10.0          | 10.3          | 103          | 1.8             |

## FIGURE

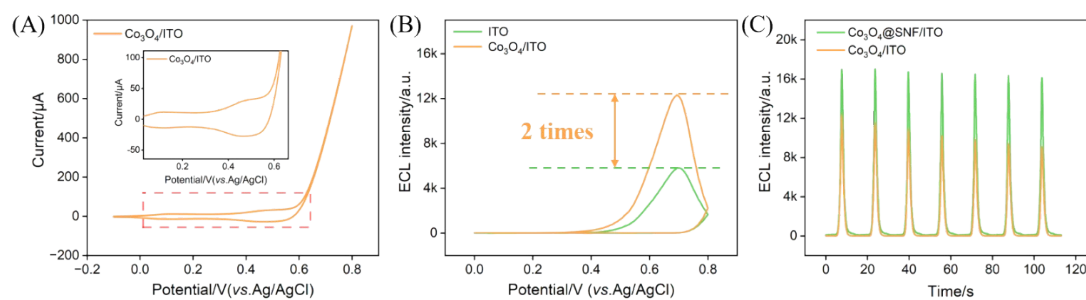

**Figure S1** (A) CV curve of Co<sub>3</sub>O<sub>4</sub>/ITO in 1 M NaOH at 50 mV s<sup>-1</sup>. Inset: magnified view of the red dashed region. (B) ECL responses of Co<sub>3</sub>O<sub>4</sub>/ITO and bare ITO in PBS (0.01 M, pH 7.4) with 100 μM luminol and 100 μM H<sub>2</sub>O<sub>2</sub>. (C) ECL signals of Co<sub>3</sub>O<sub>4</sub>@SNF/ITO and Co<sub>3</sub>O<sub>4</sub>/ITO during continuous cycling.

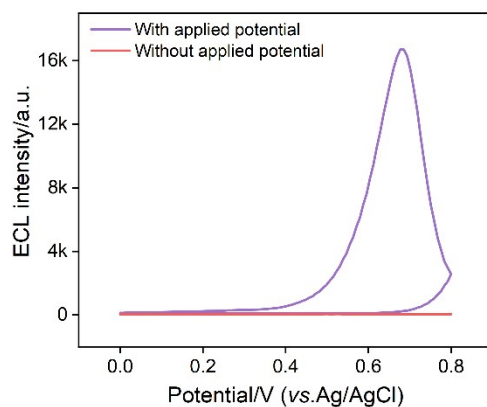

**Figure S2** ECL signals of the electrode in PBS (0.01 M, pH 7.4) containing 100 μM luminol and 100 μM H<sub>2</sub>O<sub>2</sub>, recorded with and without an applied potential.

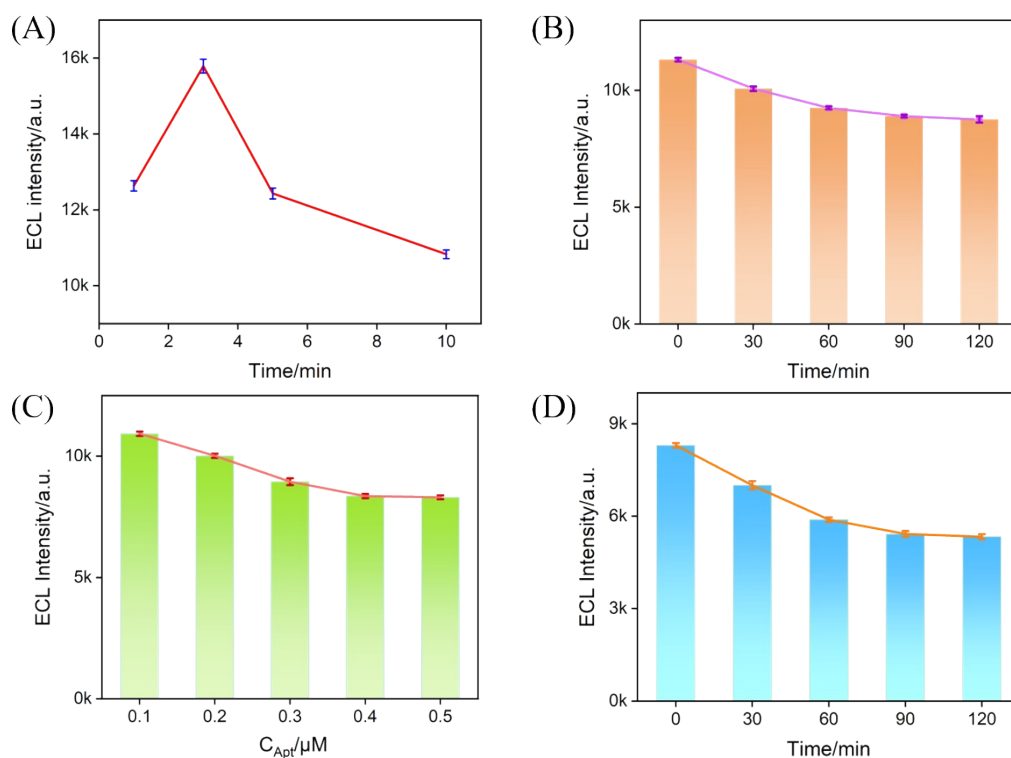

**Figure S3** (A) ECL signals obtained on the  $\text{Co}_3\text{O}_4@\text{SNF}/\text{ITO}$  electrode after deposition for varying times in PBS (0.01 M, pH 7.4) containing 100  $\mu\text{M}$  luminol and 100  $\mu\text{M}$   $\text{H}_2\text{O}_2$ . (B) ECL signals obtained after incubating the aptamer on the  $\text{Co}_3\text{O}_4@o\text{-SNF}/\text{ITO}$  electrode for different time. (C) ECL signals acquired on the  $\text{Co}_3\text{O}_4@O\text{-SNF}/\text{ITO}$  electrode fabricated with varying concentrations of the incubated aptamer in PBS (0.01 M, pH 7.4) containing 100  $\mu\text{M}$  luminol and 100  $\mu\text{M}$   $\text{H}_2\text{O}_2$ . (D) ECL signals obtained when the  $\text{BSA}/\text{Apt}/\text{Co}_3\text{O}_4@O\text{-SNF}/\text{ITO}$  electrode was incubated with 1 ng/mL MMP-9 for different time.

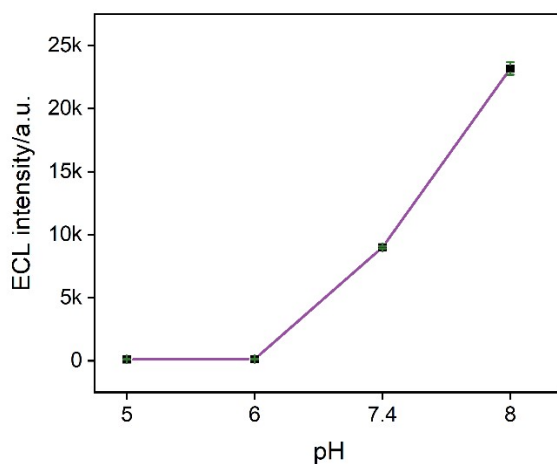

**Figure S4** ECL intensity of  $\text{Co}_3\text{O}_4@\text{SNF}/\text{ITO}$  in 0.01 M PBS (100  $\mu\text{M}$  luminol, 100  $\mu\text{M}$   $\text{H}_2\text{O}_2$ ) at different pH values. A PMT voltage of 650 V was employed to avoid signal overflow at high pH.

## References

1. J. Wang, H. Zhang, H. Hu, S. Hu and L. Ma, *International Journal of Biological Macromolecules*, 2024, **268**, 131582.
2. X. A. Yu, Y. Hu, Y. Zhang, R. Zhang, X. Bai, L. Gu, H. Gao, R. Li, J. Tian and B. Y. Yu, *ACS Sens*, 2020, **5**, 1119-1125.
3. J. A. Park, E. Park, Y. Kwon, W. Lee, J. H. Ahn, T.-H. Kim, M. Jang, J. Min, Y. Kim and T. Lee, *Sensors and Actuators B: Chemical*, 2024, **399**, 134876.
4. B. Arevalo, A. Ben Hassine, A. Valverde, V. Serafin, A. Montero-Calle, N. Raouafi, J. Camps, M. Arenas, R. Barderas, P. Yanez-Sedeno, S. Campuzano and J. M. Pingarron, *Talanta*, 2021, **225**, 122054.
5. Y. Zeng, M. Qian, X. Yang, Q. Gao, C. Zhang and H. Qi, *Mikrochim Acta*, 2023, **190**, 422.
